# Supplementary material for: BRAF V600E and RNF43 Co-mutations Predict Patient Outcomes with Targeted Therapies in Real-World Cases of Colorectal Cancer
Source: PubMed Central journal article supplement (PMC10020799; doi:10.1093/oncolo/oyac265), 2023-02-13

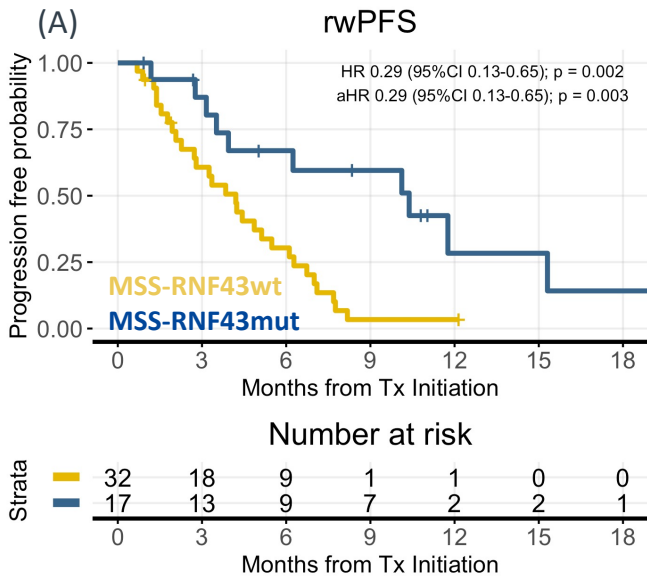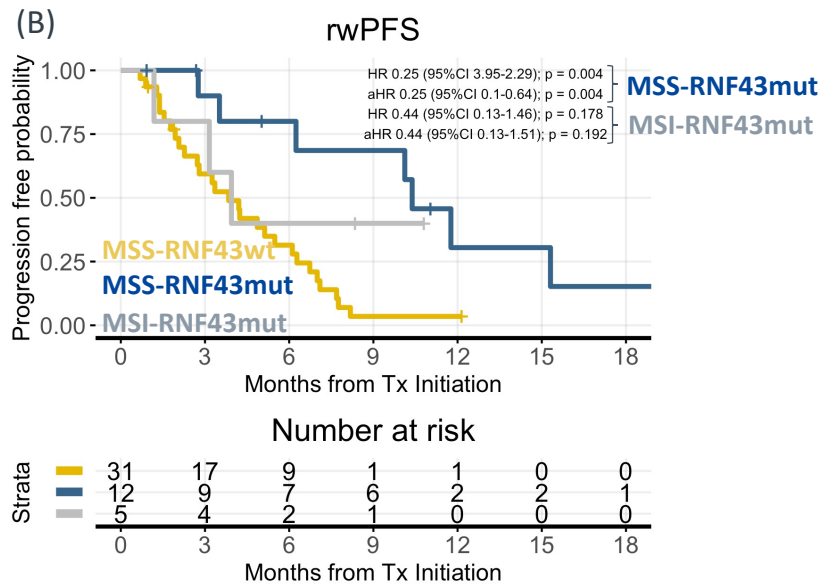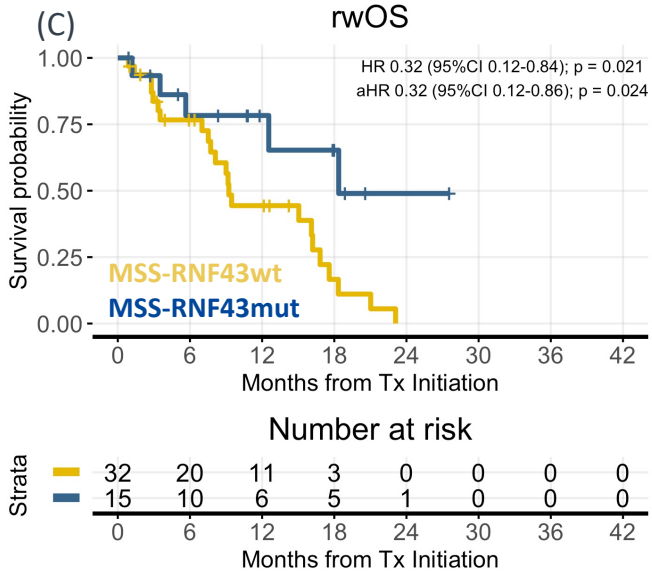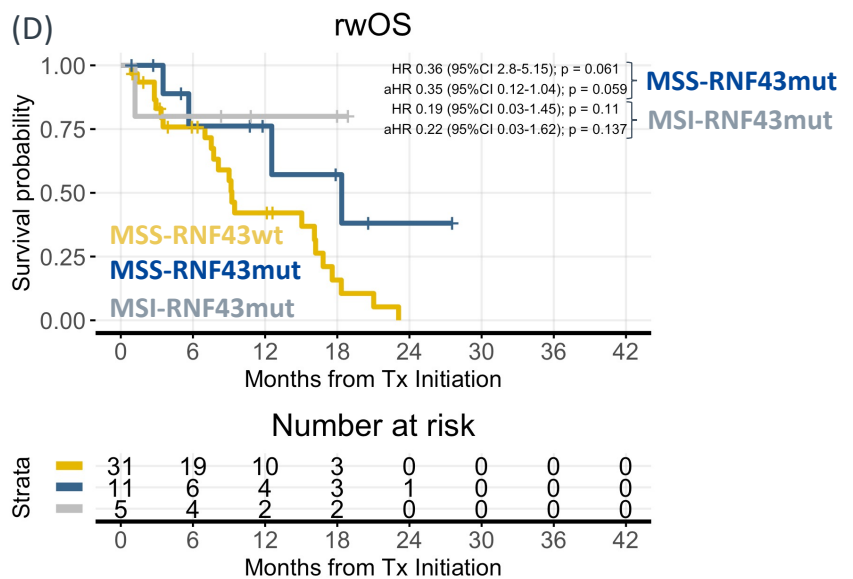

Supplement: oyac265_suppl_supplementary_figure_s1.pdf [file oyac265_suppl_supplementary_figure_s1.pdf]
